# Supplementary material for: Complexity of a small non-protein coding sequence in chromosomal region 22q11.2: presence of specialized DNA secondary structures and RNA exon/intron motifs
Source: PubMed Central journal article supplement (PMC4607176; doi:10.1186/s12864-015-1958-6), 2015-10-14
Supplement: 12864_2015_1958_MOESM1_ESM.pdf [file 12864_2015_1958_MOESM1_ESM.pdf]

CLUSTAL 2.1 multiple sequence alignment

```
human.10_000bp      TGCAGATGTAAGGAAATTATATATATATATATATATATATAATATATATACGTATATA 60
chimpanzee         -----

human.10_000bp      TTATGAAGATATATGTATATATATTATATATAATTATATATATAATATATATATAATTTG 120
chimpanzee         -----

human.10_000bp      GGAATTTGGGAATAAATTGTATCCCAACTCACACTGGGACTACACCAGCTGCCACCATGC 180
chimpanzee         -----

human.10_000bp      CTGGCTAATTTTTTCGTATTTTTAGTAGAGACAGGGTTTCACTGAATTGGCCAGGATGGTC 240
chimpanzee         -----

human.10_000bp      TTGATCTCCTCACCTTGTGATCCTCTTGCCCTGCCAAAGTGCTGGGATTACAGGC 300
chimpanzee         -----

human.10_000bp      CTGAGCCAAGATACATATTTTTTAAAGGAAGAAAAATTTCAAAGGTACTCTGTTTGGTAC 360
chimpanzee         -----

human.10_000bp      AATAATCAAATATATAAATTGAGGAATAAAACATAACCACGAAACATATTTATAACTGCA 420
chimpanzee         -----

human.10_000bp      TATGGAAAATACAGAGGATAATTTTTTAAATAACATATTTTGAAAACCTTAACTAGGAAT 480
chimpanzee         -----

human.10_000bp      TTGAAAAGATCGCATTTGACAGGCCAGTATGAACACAACCTGAACGCAGCAAGACAGGTT 540
chimpanzee         -----

human.10_000bp      CCCCATAAAAAATCAAACACAGGGAAAATGAAACCACAAAGTTTCAATCTGCTCTGACC 600
chimpanzee         -----

human.10_000bp      TTTGAAAAACTCAGCACAGACAGTGGCACTTAGGACCAACAGCAGGAGATCCCTAATCCC 660
chimpanzee         -----

human.10_000bp      ATCACCATGGCGATAGGGCATAAACATTCAGGGTGAAGTCACAATCCACATGGGAGGT 720
chimpanzee         -----

human.10_000bp      CCAACTGCTGCCAGGCAGACAGGTGTGCCTTTACATGTACAGGAAGGTCATTGAAGGCTC 780
chimpanzee         -----

human.10_000bp      AGTGTTTGTGTTTCAAAAAGTGAATCCCAAGACCAAAACATTGTTATGCTGTGCTTCTTAA 840
chimpanzee         -----

human.10_000bp      ATAAGTTATGAGATGGGAAAGAGGGCACCCCAAATATATATATATAATTATATATAATAT 900
chimpanzee         -----

human.10_000bp      AATATATATAATATACATAATTATGTATAATATAATATATAATATACATAATCTCCTT 960
chimpanzee         -----ATATACATAATTATATATAATTTAATATATATAACAGATACAATTTCCCTT 50
                    *****:***** * * * * * *****

human.10_000bp      TTACATCCTGCATCCTTATATTATATATAATATATTATATATAATAATATATAATAATAT 1020
chimpanzee         TTACATCCTGCATCATTATAATCTATATATTATCTGCAATATAATAGTAAATAAT----- 105
                    *****:*****:***.*.:*****.**:*****

human.10_000bp      ATAATTATTATATATAATATATAACAATTATATATGATTATATAATTGTATATAATTAT 1080
chimpanzee         -----TTTAATATATAATATAATATAAT-----T 131
                    *:*****.:*:*****.** *

human.10_000bp      ATATATAATATAATAATATATAATATCTATTATTATATTATATATAATATAATATTATAA 1140
chimpanzee         ATATATACTATAACAATATATTTCTATAGAATAT-----ATAT 168
                    *****:*****:***.*.:***:***:

human.10_000bp      TATATATCATATATTATAATATTATATGTAATATAATATAATATCATAATATATAATATA 1200
```



human.10\_000bp 2460  
chimpanzee  
-----

human.10\_000bp 2520  
chimpanzee  
-----

human.10\_000bp 2580  
chimpanzee 753  
-CATACATTATAT-----  
\*\*\*\*\*.\*\*.:\*\*

human.10\_000bp 2640  
chimpanzee  
-----

human.10\_000bp 2700  
chimpanzee  
-----

human.10\_000bp 2760  
chimpanzee 770  
-----GCAGACAGGTGTGCTTT  
\*\*\*\*\*

human.10\_000bp 2820  
chimpanzee 830  
TACATGTGCAGGAGGATCATTGAAGTCACAGTGTGTTTGTTCAAAACTGAATCCCAAGC  
TACATGTACAGGACAGTCATTGAAGGTCAGTGTGTTTGTTCAAAACTGAATCCCAAGC  
\*\*\*\*\*.\*\*\*\*\*.\*\*\*\*\*.\*:\*\*\*\*\*

human.10\_000bp 2880  
chimpanzee 890  
CCACACATTATTATGCTGTGCTTCTTAAAATAATTTATGAGATGGGAAATATGGCACCCC  
CCACACATTATTATGGTGTCTTCTTAAAATAAGTTATGAGATGGGAAATAGGGCACCCC  
\*\*\*\*\* \*\* \*\*\*\*\*

human.10\_000bp 2940  
chimpanzee 939  
CAAATATATATATATAATTATATATAATATAATATATATAATAGATATAATTTCTTT  
CAAATATATATATACATAATTATATGTAATACAATATATAATACATATG-----  
\*\*\*\*\* \*\*\*\*\*.\*\*\*\*\* \*\*\*\*\*:;\* \*\*.

human.10\_000bp 3000  
chimpanzee 979  
TACATCCTGCATCCTTATATATATTACATTATATAAAATATAATAATATATAATTATATA  
-----ATTATACATAATATAATATATAATACATGTAATATATA  
\*\*::\*\*\*\*\*:\*\*\*\*\*:\*\*\*\*\*::\*::: :\*:\*\*\*\*\*

human.10\_000bp 3060  
chimpanzee 1032  
TAATATAATATAATAATATAAAATATATATTACTATATTATATATAATATATAATATATA  
TAACCTCCT-----TTTTTCATCCTGCATCCTTCCATTATATATAATATATTATATA  
\*\*\* :\*. \* \*::\*. \* . \* . \* . \*\*\*\*\*:\*\*\*\*\*

human.10\_000bp 3120  
chimpanzee 1059  
TTATATATTAACAATACAATAACATATAATATATGTTATATATAAATCTATATATAATG  
TTATAAT-----AATATATAATAATATATAAT-  
\*\*\*\*: : \*\*\*\*\*:\*

human.10\_000bp 3180  
chimpanzee 1097  
TATAACATATATAATATTACCTATGATATATAAATAATATATATTATGTATAATATATCAT  
--TATCATATATAATATAACATAT-----AATTATATATAAAT---AT  
\*\*::\*\*\*\*\*:\*\*.\*\*\* :\*\*\*\*\*.\*\*\*\*\*: \*\*

human.10\_000bp 3240  
chimpanzee 1137  
ATTATAATATATATAATATAGTATATATAATATGTATTATATAAATATCTAATATTATATA  
ATATGATCATATATAATATAATATGTATAAT-----TATATAATG  
\*\*::\* : \*\*\*\*\*.\*\*\*.\*\*\*\*\* \*\*\*\*\*:\*\*\*.

human.10\_000bp 3300  
chimpanzee 1196  
ATATATAATATATCATATATAATATATTATGATATATTATATATAATATAAATACAATATA  
ATATATAAATTACATCTATAATATAGTAAAATATATTGTATATTATAT-ATGATATATA  
\*\*\*\*\*:\*\*\*:\*\*\*.\*\*\*\*\* \*\*..\*\*\*\*\*.\*\*\*\*\*.\*\*\*\*\* \*\*..\*\*\*\*\*

human.10\_000bp 3360  
chimpanzee 1253  
ATATATTATATATTATGATACATTATATATAATATAAATACAATAAAATATATTATATATT  
ATATAGTAATATTTATTTTACATTATATATTATAT---ACAATACAATATATTACATATA  
\*\*\*\*\* \*\*:::\*\*\* :\*\*\*\*\*.\*\*\*\*\* \*\*\*\*\*.\*\*\*\*\* \*\*\*\*\*

human.10\_000bp 3420  
chimpanzee 1288  
ATGATACATTATATATAATATAAATACAATAAAATATATTATATATTATGATATATAATAT  
AT-----ATATAATACATAATATATGATGTTCTATATTAT  
\*\* \*\*\*\*\* \*\*::\*\*\*\*\* \*\*:\* \*\*\*\*\*:\*\*\*

human.10\_000bp 3480  
chimpanzee 1345  
GTAATAAAATATAATATAATTATATATAATATAATATAACATATAAATTTATGATAT  
G---TATAATATATTGAATATATAAAATATATATTAATCATATATATTATATATAATAT  
\* \*\*::\*\*\*\*\*:\*.:::\*\*\*:\*\*\*:\*\*\*:\*\*\*:\*\*\*.\*\*\* \*\*\*\*\*:\*\*\*.\*\*\*.\*\*\*

human.10\_000bp 3540  
chimpanzee  
-----

human.10\_000bp 3600  
chimpanzee  
-----

```

human.10_000bp      CTCCCAGGTAGCTGGGACTACACCACACGGGGACTACACCAGGTGCCACCATGCCTGGCT 3660
chimpanzee          -----CCAT----- 1349
                    ***

human.10_000bp      AATTTTTGTATTTTTAGTAAAGACAGGGTTTCACTGTATTTGCCAGGATGGTCTTCATC 3720
chimpanzee          -----

human.10_000bp      TCCTCACCTTGTGATCCTCTTGCCCTGGCCCTCCCAAAGTGCTGGGATTACAGGCCTGAGC 3780
chimpanzee          -----

human.10_000bp      CAAGATACATATTTGTTAAAGGTAGAAAAATTTCAAATGTACTCTGCTTGGTACAATAAT 3840
chimpanzee          -----

human.10_000bp      CAAATATATAAATTGAGGAATAAAACATAACCATGAAACATATTTATAACTGCATATGGA 3900
chimpanzee          -----

human.10_000bp      AAATATAGAGGATAATTTTTTAAATAACATATTTCAAAGCATTAACTAGCAATTTGAAA 3960
chimpanzee          -----

human.10_000bp      AGATCGCATTTGACAGGCCAGTATGAACATACCTTGAATGCAGCAAGACAGGTTCCCCAT 4020
chimpanzee          -----

human.10_000bp      AAGAAAAATCAAATCAGGGAAAATGAAACCACAAAGGTTCAATCTGCTCTGACCTTCA 4080
chimpanzee          -----

human.10_000bp      AAAACTCAGCACAGACAGTGGCATTTAGGACCAACGGCAGGAGATCCCTAATCCCATCAC 4140
chimpanzee          -----

human.10_000bp      CATGGCGATAGGGCATAAACATTCAGGGTGAAGGCACAATCCACACTGTGAGGTCCAAC 4200
chimpanzee          -----

human.10_000bp      TGCTGCCATGAAGACAGGTGTGCTTTTACATGTACAGGAAGGTCATTGAAGGTTCAGGGT 4260
chimpanzee          -----

human.10_000bp      TTTATTTCAAAAATGGATCCCAAGCCACACATTATTATGCTGTGCTTCTCAAAAATAAG 4320
chimpanzee          -----

human.10_000bp      TTATGAGATGGGAAATAGGGCACCCCCAAATATATATATATATATTTATAATTATATATA 4380
chimpanzee          -----TATATTATTACATTAA 1365
                    *:***:**** **::*

human.10_000bp      ATATAATATATAATATATATAACACATATATAATTTCTTTTACATCCTGAATCCTTATA 4440
chimpanzee          GTATAATATATAATATATA-----ATATATGATT-----ACATTATA 1402
                    .*****          *****.* **          :*.*****

human.10_000bp      TTATATATAACATATTATATAGAAGATATATAATATATTTTGTACATAATATAATAT 4500
chimpanzee          TATTATATTATATATTATATTAGA-----TACATAATACAATAT 1441
                    *:***:* *****:.*          ***** *****

human.10_000bp      ATATAATTATATCTAAATATATAATTATATATAATTATATCTAAATATATAATTATATAT 4560
chimpanzee          ATAAATATTATAT---AATATATAATAAATAATAT-----AATATATAAG----- 1482
                    ***:***** *****:***:***: *****

human.10_000bp      AATTATATCTAAATATATAATTATATATAATTATATCTAAATATATAATTATATATAATT 4620
chimpanzee          -----ATATGATTATATATAAT---ATAATATAATATAATTATATATAAT- 1524
                    ****.***** **.:*:*****

human.10_000bp      ATATCTAAATATATAATTATATATAATTATATCTAAATATATAATTATATATAATTATAT 4680
chimpanzee          -----ATAATATAATCATTGTAAAT-----ATAATATATATTATATT 1561
                    *:***** **:*.***          **:*****:***:

human.10_000bp      CTAAATATATAATTATATATAATTATATCTAAATATATAATATATTATGCTATATTATACA 4740
chimpanzee          ATATATAATATATCATATATAATAATATTTTCATATATTATATAATAG---ATATCATACA 1618
                    .**:*:::*** *****:**** *.*****:*****:** *****

human.10_000bp      TAATATAATATAATGATATATAGTATAATATAATATATATCATATATATCATATATTATA 4800
chimpanzee          TTAGAGATTAT-----ATATAATATATATCATATGTTATATATAATATT 1662
                    *: * *:* **          *****:***:

```

human.10\_000bp 4860  
chimpanzee 1721  
\*\*\*\*\* .\*\*\*\*\*:\*\*\*\*. \*\*\*\*\*.\*:\*\*\*\*\*. \*\*\*\*\*.\*\*\*\*\*

human.10\_000bp 4920  
chimpanzee 1776  
\*\*\*\*:\*\*\*\*.\*.\* .\*\*\*:\*\*\*\*\* \*\*\*\*\* \*\* \*\*\*\*\*:\*\*\* \*

human.10\_000bp 4980  
chimpanzee 1834  
.\*:\*\*\*\*\* \*\*\*\*\*:\*\*\*\*.\*\*\*\*\* \*\*\*\*\*:\*\*\*\*\*:\*\*\*\*\* \*\*

human.10\_000bp 5040  
chimpanzee 1888  
\*\*\*\*\*:\*\*\*\*\*.\*\*\* \* \*\*:\*\*\*\*\*:\*\*\*\*\*.\*\*\*.\*\*\*\*\*: \*\*\*\*\* \*\*

human.10\_000bp 5100  
chimpanzee 1946  
\*\*\*\* .\*\*\*\*\*:\*\*\*\*\* :\*\*\*\*\*. \*\*\*\*\*:\*\*\*.\*.: \*\*\*\*\*:\*\*\*\*\*.\*.\*\*\*

human.10\_000bp 5160  
chimpanzee 1991  
\*\*\*\*\*.\* \*\*\* \*\*:\*\*\*\*\* \*\*\*\*\* \*\* \*:\*\*\*:\*\*

human.10\_000bp 5220  
chimpanzee 2048  
\*\*\*\*\*:\*\*\*\*\*.\*\*\*\*\* \*\*:\* \*\*:\* \* :\*:\*\*\*.\*.\*.\*: .\*\* ..

human.10\_000bp 5280  
chimpanzee 2107  
\*\* :\*.\* :\*:\*\*\*:\*\*\*:\*\*\*\*\*:\*\*\*.\* \*\*:\* \*\* .\*\*\*:\*\*\* \*\* \*:\* \*\*::

human.10\_000bp 5339  
chimpanzee 2167  
\*:\*.\*.\* :\*\*\*. \*\*:\* \*\* \*:\* \*\*:\*:\*\*\*:\*\*\*: \*\*\*\*\*:\*\*\*:\* \*:\* \* \*:

human.10\_000bp 5399  
chimpanzee 2227  
\*:\*.\*.\*:\*\*\*: :\*:\*\*\*.. \*\*:\* . \* \* . :\*:\*\*\*. \*\*\*. \*:\*.\*. :.

human.10\_000bp 5459  
chimpanzee 2287  
:\*. \* \* .\*\* . \*\*:\* \*\*\*\* .:\*\*\*\*\*:\*\*\*\*\*. \*\* \*\*\*\*\* \* \* \*

human.10\_000bp 5519  
chimpanzee 2339  
\*\* .\*: . \*\*\*\*\*:\*\*\* \*\*:\*:\*\*\*:\*\*\*:\*\*\*\*\*:\*\*\*\*\*

human.10\_000bp 5579  
chimpanzee 2388  
\*\* .\*\*\*\*\*:\*\*\*\*\*:\*\*\*\*\*:\*\*\*\*\*:\*\*\*\*\*:\*\*\*\*\*:\*\*\*\*\*

human.10\_000bp 5639  
chimpanzee 2447  
\*\*\*\*: \*.\* \*\* \*\*\*\*\*:\*\*\*\*\*:\*\*\*\*\*:\*\*\*.\*\*\*:\*.\*\*\* \* \*\*\*\*\*.\*:\*\*\*

human.10\_000bp 5699  
chimpanzee 2502  
\*\*\*\*.\*.\*:\*\*\*\*\* \*\*:\* \*\*:\*:\*\*\*:\*\*\*.\*\*\*.:\*\*:\*.\* \*\*\*\*\*.\*.

human.10\_000bp 5759  
chimpanzee 2561  
\*\*\*.\*.\*.\*\*\*\*\*:\*\*\*:\*.\*\*\*:\*.\*\*\*\*\*:\*.\*\*\*\*\*:\*\*\*.\*\*\*.\*\*\*:\*\*\* \*\*:\*\*\*\*

human.10\_000bp 5819  
chimpanzee 2621  
\*\*.\*:\*\*\*\*\*.\*\*\*\*\* \*\*\*\*\* \*\*\*\*\* \*\*\*\*\*

human.10\_000bp 5879  
chimpanzee 2681  
\*\*\*\*\*.\*\*\*\*\* \*\*\*\*\* \*\*\*\*\* \*\*\*\*\*

human.10\_000bp 5939  
chimpanzee 2741  
\*\*\*\*\* \*\*\*\*\* \*\*\*\*\*:\*\*\*.\*\*\*\*\* \*\*\*\*\*.\*:\*\*\*\*\*

human.10\_000bp 5999  
chimpanzee 2800  
\*\*\*\*\* \*\*\*\*\*:\*\*\*\*\*: \*\*\*\*\*.\* \*\*.\* \*\*\*\*\*

human.10\_000bp 6059

chimpanzee TTGGCCAGGATGGTCTTGATCTCCTCACCTTGTGATCCTCTTGCCTTGGCCTCCCAAAGT 2860  
 \*\*\*\*\*  
 human.10\_000bp GCTGGGATTACAGGCCTGAGCCAAGATACATATTTTTTAAAGGAAGAAAAATTTCAAAGG 6119  
 chimpanzee GCTGGGATTACAGGCCTCAGCCAAGATACATATTTTTTAAAGGAAGAAAAATTTCAAAGG 2920  
 \*\*\*\*\*  
 human.10\_000bp TACTCTGCTTGGTACAATAATCAAATATATAAATTGAGGAATAAACATAACCATGAAAC 6179  
 chimpanzee TACTCTGCTTGGTACAATAATCAAATATATAAATTGAGGAATAAACATAACCATGAAAC 2980  
 \*\*\*\*\*  
 human.10\_000bp ATATTTATAACTGCCTATGGAAAATACAGAGGATAATTTTTTAAATAACATATTTTGAAA 6239  
 chimpanzee ATGTTTATAACTGCATATGGAGAATACAGAGGATAATTTTTTAAAAACGTATTTTGAAA 3040  
 \*\* \*\*\*\*\* \*\*\*\*\* \*\*\*\*\* \*\*\*\*\*  
 human.10\_000bp GCATTAACCTAGTAATTTGAAAAGATCGCATTTGGCAGGCCAGTATGAACATACCTTGAAT 6299  
 chimpanzee GCATTAACCTACCAATTTGAAAAGATCGCATTTGACAGGCCAGTATGAACATACCTTGAAT 3100  
 \*\*\*\*\* \*\*\*\*\* \*\*\*\*\* \*\*\*\*\* \*\*\*\*\*  
 human.10\_000bp GCAGCAAGACAGGTTCCCCATAAGAAAATCAAATCAGGGAATATGAAACCACAAAGGT 6359  
 chimpanzee GCAGCTACACAGGTTCCCCATAAGAAAATCAAATCAGGGAATATGAAACCACAAAG-- 3158  
 \*\*\*\*\* \*\*\*\*\* \*\*\*\*\* \*\*\*\*\* \*\*\*\*\*  
 human.10\_000bp TCAATCTGCTCTGACCTTT-CAAAACTCAGCACAGACAGTGGCACTTAGGACCAACGGC 6418  
 chimpanzee -----GCTCTGACCTTTGTAAAACTCAGCACAGACAGTGGCACTTAGGACCAACGGC 3211  
 \*\*\*\*\* \*\*\*\*\* \*\*\*\*\* \*\*\*\*\* \*\*\*\*\*  
 human.10\_000bp AGGAGATCCCTAATCCCATCACCATGGCGATAGGGCATAAACATTCAGGGTGAAGACAC 6478  
 chimpanzee AGGAGATCCCTAATCCCATCACCATGGCGATAGGGCATAAACATTCAGGGTGAAGGCAC 3271  
 \*\*\*\*\* \*\*\*\*\* \*\*\*\*\* \*\*\*\*\* \*\*\*\*\*  
 human.10\_000bp AATCCACATTGGGAGGTGCAACTGCTGCCATGCAGACACGTGTGCTTTTCCATGTACAGG 6538  
 chimpanzee AATCCACCTTGGGAGGTCCAACGCTGCCATGCAGACAGGCGTGTGCTTTTACATGTACATG 3331  
 \*\*\*\*\* \*\*\*\*\* \*\*\*\*\* \*\*\*\*\* \*\*\*\*\*  
 human.10\_000bp AATGTCATTGAAGGCTCAGTGTGTTTTGTTTCAAAAATGAAATCCCAAGCTCACACATTATT 6598  
 chimpanzee AAGGTCATTGAAGGCTCAGTGTGTTTTGTTTCAAAAATGCTTCCCAAGCCGATACTTTATT 3391  
 \*\* \*\*\*\*\* \*\*\*\*\* \*\*\*\*\* \*\*\*\*\*  
 human.10\_000bp ATGCTGTGATTCTTGAATAAGTTATGAGATGGGAAATAGGGCACCCCAATATAGCCA 6658  
 chimpanzee ATGCTGTGCTGCTTAAATAAGTTATGAGATGGGAAATAGGGCACCCCAATATAGCCA 3451  
 \*\*\*\*\* \*\*\*\*\* \*\*\*\*\* \*\*\*\*\* \*\*\*\*\*  
 human.10\_000bp ATAGTGAGAGTTTCAAATGAAGAGAGGCACAACCTGATACGTTGAGAATAAACAGAGATT 6718  
 chimpanzee ATAGTGACAGTTTCAAATGAAGAGAGGCACAACCTGATACGTTGAGAATAAACAGAGATT 3511  
 \*\*\*\*\* \*\*\*\*\* \*\*\*\*\* \*\*\*\*\* \*\*\*\*\*  
 human.10\_000bp CCATTCGCTTTTTCTTTTTTAACCTTTTATGTTAGATTTCAGGGTGTACATGTGCAGG-TT 6777  
 chimpanzee CCATTCGCTTTTTCTTTTTCAACCTTTTATGTTAGATTTCAGGGTGTACATGTGCAGGTTT 3571  
 \*\*\*\*\* \*\*\*\*\* \*\*\*\*\* \*\*\*\*\* \*\*\*\*\*  
 human.10\_000bp TTTTCTGGGTATATTGTGTGGTGTGAGGTTTTGGGTGTGAATGATCCCAACACCCAGG 6837  
 chimpanzee TTTACCTGGGTATATTGTGTGGTGTGAGGTTTTGAGGTGTGAATGATCCCAACACCCAGG 3631  
 \*\*\*\*\* \*\*\*\*\* \*\*\*\*\* \*\*\*\*\* \*\*\*\*\*  
 human.10\_000bp TACTGAACATGGTACTCAGCAGTTTTTCAACCTTTTCTTCCCTCCCTCCCTCCTAGCA 6897  
 chimpanzee TACTGAACCTGGTACTCAGCAGTTTTTCAACCTTTTCTTCCCTCCCTCCCTCCTAGCA 3691  
 \*\*\*\*\* \*\*\*\*\* \*\*\*\*\* \*\*\*\*\* \*\*\*\*\*  
 human.10\_000bp G-TCCTAGTGTCTATTGTACCATCTTCATGTCCATGGGTACTCAGAATTTAGCTCCTAC 6956  
 chimpanzee GTCCCTAGTGTCTGTTGTACCATCTTCATGTCCATGGGTACTCAGAATTTAGCTCCTAC 3751  
 \* \*\*\*\*\* \*\*\*\*\* \*\*\*\*\* \*\*\*\*\* \*\*\*\*\*  
 human.10\_000bp TTATAGGAACATGAGGCGTTTGTGTTTTCTTTACTGCATTAGTTCACCTTCGTGGATTCCAG 7016  
 chimpanzee TTACAGGAACATGAAGCGTTTGTGTTTTCTTTACTGCATTAGTTCACCTTCGTGGATTCCAG 3811  
 \*\*\* \*\*\*\*\* \*\*\*\*\* \*\*\*\*\* \*\*\*\*\*  
 human.10\_000bp CTCTAGACATTTTCCCTCAAAGAACATAATTTTCATTCGTTTTTGTGGCTGCATAGTATTC 7076  
 chimpanzee CTCTAGACATTTTCCCTCAAAGAACATAATTTTCATTCGTTTTTGTGGCTGCATAGTATTC 3871  
 \*\*\*\*\* \*\*\*\*\* \*\*\*\*\* \*\*\*\*\* \*\*\*\*\*  
 human.10\_000bp CATGGTCTATATGTACCACATTTTTATCCAGTCCACTGTTGATGGGCACCTAGGTTGATC 7136  
 chimpanzee CATGGTCTATATGTACCACATTTTTATCCAGTCCACTGTTGATGGGCACCTAGGTTGATC 3931  
 \*\*\*\*\* \*\*\*\*\* \*\*\*\*\* \*\*\*\*\* \*\*\*\*\*  
 human.10\_000bp CCATGTCTTTGCTAATGTGAATAGTGTGCAATAAACATATAAGCGCATACGCTTTTTTG 7196  
 chimpanzee CCATGTCTTTGCTAATGTGAATAGTGTGCAATAAACATATAAGCGCATACGCTTTTTTG 3991  
 \*\*\*\*\* \*\*\*\*\* \*\*\*\*\* \*\*\*\*\* \*\*\*\*\*  
 human.10\_000bp GTGGAATGATTTGTTTTCTTTTGGATACATATTCAGTAATGAGACTGCTGGGTGAAATGT 7256  
 chimpanzee GTGGAATGATTTGTTTTCTTTTGGATACATATTCAGTAATGAGACTGCTGGGTGAAATGT 4051

\*\*\*\*\*

|                |                                                                |      |
|----------------|----------------------------------------------------------------|------|
| human.10_000bp | TAGTTCGTGTTTTATGTTCTTTGAGAAATCTCCAAATTGCTTTCCACAGTGGCTGAACTAA  | 7316 |
| chimpanzee     | TAGTTCGTGTTTTATGTTCTTTGAGAAATCTCCAAATTGCTTTCCACAGTGGCTGAACTAA  | 4111 |
| *****          |                                                                |      |
| human.10_000bp | CTTACATCCCCACCAAAGGTGTATAAGCATTCCTTTTCTCCTTATCCTTGCCAGTATCT    | 7376 |
| chimpanzee     | CTTACATCCCCACCAAAGGTGTATAAGCATTCCTTTTCTCCTTATCCTTGCCAGTATCT    | 4171 |
| *****          |                                                                |      |
| human.10_000bp | GCTATTTTTTTTTTTTTT---ACTTTTTAAAAATAGCCATTCTGACTAGTGAGAGATAAT   | 7432 |
| chimpanzee     | GCTATTTTTTTTTTTTTT---GACTTTTTAAAAATAGCCATTCTGACTGGTGAGAGATAAT  | 4231 |
| *****          |                                                                |      |
| human.10_000bp | ATCTCATTGTGGTTTTGATTTGCATTTCTCTCGTGATTAGTGATGATGAGCATTTTTTTC   | 7492 |
| chimpanzee     | ATCTCATTGTGGTTTTGATTTGCATTTCTCTCGTGATTAGTGATGATGAGCATTTTTTTC   | 4291 |
| *****          |                                                                |      |
| human.10_000bp | ATGTTTGTGGCTGCATGTGTGTCTCCTTCTGAGAAGTGTCTATGTCTTTTCCCCCTTTT    | 7552 |
| chimpanzee     | ATGTTTGTGGCTGCATGTGTGTCTCCTTCTGAGAAGTGTCTGTGTCTTTTCCCCCTTTT    | 4351 |
| *****          |                                                                |      |
| human.10_000bp | TAAATGGGGTTGTGTTTTGCTTGTGAATTATGTTCCCTTATAGATTCTAAATATTAGACC   | 7612 |
| chimpanzee     | TAAATGGGGTTGTGTTTTGCTTGTGAATTATGTTCCCTTATAGATTCTAAATATCAGACC   | 4411 |
| *****          |                                                                |      |
| human.10_000bp | TTTGTGGATGCATAGTTTGTGAATAATTCCCCCATTTCTGTAGGTTGTTACTCTGCTG     | 7672 |
| chimpanzee     | TTTGTGGATGCATAGTTTGTGAATAATTCCCCCATTTCTGTAGGTTGTTACTCTGCTG     | 4471 |
| *****          |                                                                |      |
| human.10_000bp | ATGGTTTCCTTTGCTGTGTGGCAGCTCTTAGTTTAATTAGGTCCCATTTGTCAACTTTT    | 7732 |
| chimpanzee     | ATGGTTTCCTTTGCTGTGTGGCAGCTCTTAGTTTAATTAGGTCCCATTTGTCAACTTTT    | 4531 |
| *****          |                                                                |      |
| human.10_000bp | GCTTTTGTGCAATTTCTTTTGAAGACTTAGTCATGAATTATTTCCCATAGCCCATATCC    | 7792 |
| chimpanzee     | GCTTTCGTTGCAATTTCTTTTGAAGACTTAGTCATGAATTATTTCCCATAGCCCATATCC   | 4591 |
| *****          |                                                                |      |
| human.10_000bp | AGAATGGTACTTTTGAAGTTTTCTTCTAGGATTATTGTAGTTGAGGTCCTAAATTTAA     | 7852 |
| chimpanzee     | AGAATGGTACTTTTGAAGTTTTCTTCTAGGATTATTGTAGTTGAGGTCCTAAATTTAA     | 4651 |
| *****          |                                                                |      |
| human.10_000bp | ATCTTTAATCCAACCTGAGTTAATTTTTGTATATGGTGAAAAGGTGACCAGTTTTTTGTT   | 7912 |
| chimpanzee     | ATCTTTAATCCAACCTGAGTTAATTTTTGTATATGGTGAAAAGGTGACCAGTTTTTTGTT   | 4711 |
| *****          |                                                                |      |
| human.10_000bp | TTTTGTTTTGTTTTTTGTTTGTGTTGTTGTTGTTTTTTGAGAGGTAGTCTTCCCTCTGCACC | 7972 |
| chimpanzee     | TTTTGTTTTGTTTTTTGTTTGTGTTGTTGTTGTTTTTTGAGAGGTAGTCTTCCCTCTGCACC | 4771 |
| *****          |                                                                |      |
| human.10_000bp | AGGCTGTAGCAGAGTGGCGCCATCTCAGCTCACAGCAACCTCCACCTGCCGGGTTCAAGC   | 8032 |
| chimpanzee     | AGGCTGTAGCAGAGTGGCGCCATCTCAGCTCACAGCAACCTCCACCTGCCGGGTTCAAGC   | 4831 |
| *****          |                                                                |      |
| human.10_000bp | GCTTCTCCTGCCTCAGCTTCCCTGAGTCGCTGGGATTACAGGCACGTGCCACCACCCCAG   | 8092 |
| chimpanzee     | GATTCTCCTGCCTCAGCTTCCCTGAGTCACCTGGGATTACAGGCACGTGCCACCACCCCAG  | 4891 |
| * . *****      |                                                                |      |
| human.10_000bp | CTAATTTTGTATTTTTAGTAGAGACAGGTTTACCATGTTGGCCGGGCTGGACTTGAT      | 8152 |
| chimpanzee     | CTAATTTTGTATTTTTAGTAGAGACAGGTTTACCATGTTGGCCGGGCTGGACTCGAT      | 4951 |
| *****          |                                                                |      |
| human.10_000bp | CTTCTGACCTTGTGATCCTCCCACCTTGCCCTCCCAAAGTGCTGGGATCACAGTCGTGAG   | 8212 |
| chimpanzee     | CTTCTGACCTTGTGATCCTCCCACCTTGCCCTCCCAAAGTGCTGGGATCACAGTCGTGAG   | 5011 |
| *****          |                                                                |      |
| human.10_000bp | CCACTGTGCCTGGCCAATAAGGTGCATTATTAACATCAATAAAGCTCAGGAAACAGCTTT   | 8272 |
| chimpanzee     | CCACTGTGCCTGGCCAATAAGGTGCATTATTAACATCAATAAAGCTCAGGAAACAGCTTT   | 5071 |
| *****          |                                                                |      |
| human.10_000bp | CACCATATTTTTGTTTAAATTTACAGTTTTTCCCAGAGTCTTTGGAATAGATTCTCCCTC   | 8332 |
| chimpanzee     | CACCATATTTTTGTTTAAATTTACAGTTTTT-----CTTTGGAATAGATTCTCCCTC      | 5122 |
| *****          |                                                                |      |
| human.10_000bp | CATGAGCCAGAGAACTTACAATGTTCACTACAGTGTCTTTAAATGTAGCAGTAGCAGCTG   | 8392 |
| chimpanzee     | CATGAGCCAGAGAACTTACAATGTTCACTACAGTGTCTTTAAATGTAGCAGTAGCAGCTG   | 5182 |
| *****          |                                                                |      |
| human.10_000bp | TGGGTTGAGAACACAAGTCTTCGACTCTTCCCTTTTAGAGCCAGCCATTCACGGTGCTCTG  | 8452 |
| chimpanzee     | TGGGTTGAGAACACAAGTCTTCGACTCTTCCCTTTTAGAGCCAGCCATTCACGGTGCTCTA  | 5242 |
| *****          |                                                                |      |

human.10\_000bp 8512  
chimpanzee 5302  
\*\*\*\*\*.\*\*\*\*\*.\*\*\*\*\*

human.10\_000bp 8572  
chimpanzee 5362  
\*\*\*\*\*

human.10\_000bp 8632  
chimpanzee 5422  
\*\*\*\*\*

human.10\_000bp 8692  
chimpanzee 5478  
\*\*\*\*\*

human.10\_000bp 8752  
chimpanzee 5538  
\*\*\*\*\*

human.10\_000bp 8812  
chimpanzee 5598  
\*\*\*\*\*

human.10\_000bp 8872  
chimpanzee 5658  
\*\*\*\*\*

human.10\_000bp 8931  
chimpanzee 5718  
\*\* . \*\*\*\*\*

human.10\_000bp 8991  
chimpanzee 5778  
\*\*\*\*\*

human.10\_000bp 9051  
chimpanzee 5837  
\*\*\*\*\*.\*\*\*\*\*

human.10\_000bp 9111  
chimpanzee 5897  
.\* \* .\*\*\*\*\*.\*\*\*\*\*

human.10\_000bp 9170  
chimpanzee 5957  
\*\*\*\*\*

human.10\_000bp 9230  
chimpanzee 6017  
\*\*\*\*\*

human.10\_000bp 9290  
chimpanzee 6077  
\*\*\*\*\*

human.10\_000bp 9350  
chimpanzee 6137  
\*\*\*\*\*

human.10\_000bp 9410  
chimpanzee 6197  
\*\*\*\*\*

human.10\_000bp 9470  
chimpanzee 6257  
\*\*\*\*\*.\*\*\*\*\*

human.10\_000bp 9530  
chimpanzee 6317  
\*\*\*\*\*

human.10\_000bp 9590  
chimpanzee 6377  
\*\*\*\*\*

human.10\_000bp 9650  
chimpanzee 6436  
\*\*\*\*\* :\*\*\*\*\*
